# Supplementary figures and images for: Comprehensive copy number profiles of breast cancer cell model genomes
Source: Springer Nature journal article supplement (doi:10.1186/bcr1370), 2006-01-03

# S-11: 20q Multiple Alignment

+/- 1.0 scale bars are included for reference

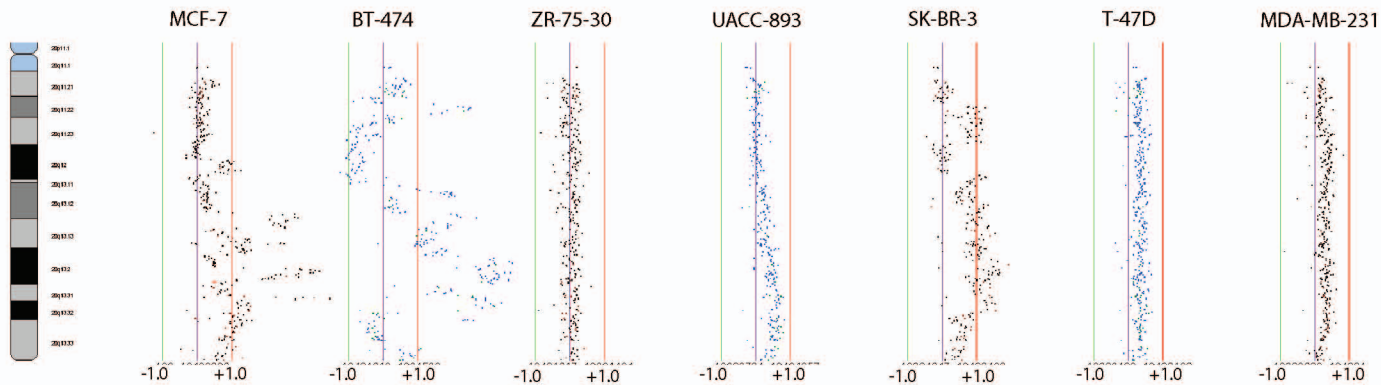

Supplement: Additional file 11 [file bcr1370-s11.pdf]
